# Supplementary material for: Genome-wide studies of PAL genes in sorghum and their responses to aphid infestation
Source: PubMed Central journal article supplement (PMC9800386; doi:10.1038/s41598-022-25214-1), 2022-12-29
Supplement: 41598_2022_25214_MOESM1_ESM.pdf [file 41598_2022_25214_MOESM1_ESM.pdf]

| Motif | Symbol                                                                              | Motif | Symbol | Motif                                               | Consensus                    |
|-------|-------------------------------------------------------------------------------------|-------|--------|-----------------------------------------------------|------------------------------|
| 1.    |    | 1.    |        | LDPLMKPKQDRYALRTSPQWLG                              | PQIEVIRAATKSIEREINSVNDNPLIDV |
| 2.    |    | 2.    |        | RNPSLDYGFKGAEIAMASYCSELQFLGNPVTNHVQSAEQHNQDVNSLGLI  |                              |
| 3.    |    | 3.    |        | SAVFCEVMNGKPEYTDHLTHKLNKHPGQIEAAAIMEHILEGSSYMKLAKK  |                              |
| 4.    |    | 4.    |        | KALHGGNFQGTPIGVSMNTRLAIAAIGKLMFAQFSELVNDYYNGLPSN    |                              |
| 5.    |    | 5.    |        | RINTLLQGYSGIRFEILEAIAKLLNANVTPCLPLRGTITASGDLVPLSYI  |                              |
| 6.    |    | 6.    |        | SSDWVMBMNGTDSYGVTGFGATSHRRTKEGGALQRELIRFLNAGAFG     |                              |
| 7.    |    | 7.    |        | CRSYPLYRFVRZELGAVYLTGEKTRSPGEELNKVLVAINQKGKIDPLLEC  |                              |
| 8.    |    | 8.    |        | SSRKTAEAIDILKLSSTFLIALCQAVDLRHJEENVKSAVKSCVMTVAKK   |                              |
| 9.    |    | 9.    |        | TGRENSVAVAPDGTKVNAAEAFKIAGIQGGFFELQPKEGLAMVNGTAVGS  |                              |
| 10.   |    | 10.   |        | ADPLNWGKAAEELTGSHLDEVKRMVAEYRQPLVKIEGASLRIAQVA AVAA |                              |
| 11.   |    | 11.   |        | LHVARFCEKDLLTAIDREAVFAYADDPCSANYPLMKKLRAVLVEHALANG  |                              |
| 12.   |    | 12.   |        | ETSVFAKVAZFEEELRAALPKEVEAARA AVENG TAP              |                              |
| 13.   |   | 13.   |        | DGHVLP AEATRAAML                                    |                              |
| 14.   |  | 14.   |        | KEWNGEPLPIC                                         |                              |
| 15.   |  | 15.   |        | ARVELDESARGRVKA                                     |                              |
| 16.   |  | 16.   |        | TVLFEANVLAILAEV                                     |                              |
| 17.   |  | 17.   |        | MECENGRVAATNGDGLCMATP                               |                              |
| 18.   |  | 18.   |        | PNRITE                                              |                              |
| 19.   |  | 19.   |        | TLSTNSTG                                            |                              |
| 20.   |  | 20.   |        | AAEFDA                                              |                              |

**Supplementary Figure 1.** The sequence information of each motif presented in **Fig. 1C**.



|                  |                                                                                                                           |     |
|------------------|---------------------------------------------------------------------------------------------------------------------------|-----|
| Sobic.004G220500 | SPQWLGFPQIEVIRAATKSIEREINSVNDNPLIDVARSKALHGGNFQGTPIGVSMNDTRLA                                                             | 413 |
| Sobic.004G220600 | SPQWLGFPQIEVIRAATKSIEREINSVNDNPLIDVARSKALHGGNFQGTPIGVSMNDTRLA                                                             | 413 |
| Sobic.004G220700 | SPQWLGFPQIEVIRAATKSIEREINSVNDNPLIDVARSKALHGGNFQGTPIGVSMNDTRLA                                                             | 413 |
| Sobic.004G220300 | SPQWLGFPQIEVIRAATKSIEREVNSVNDNPVIDVHRGKALHGGNFQGTPIGVSMDNARLA                                                             | 402 |
| Sobic.006G148800 | SPQWLGFPQIEVIRAATKSIEREVNSVNDNPVIDVHRGKALHGGNFQGTPIGVSMDNARLA<br>:*****:*:* *****:*****:* * .*****:*****:***              | 402 |
| Sobic.001G160500 | VAAIGKLMFAQFTELVSSFYNSGLPSNLSSGRDPSLDYGFNGAEVAMASYCSELQFLANP                                                              | 476 |
| Sobic.006G148900 | VAAIGKLMFAQFSELVNDFYNNGLPSNLSSGRNPSLDYGFNGAEIAMASYCSELQFLANP                                                              | 473 |
| Sobic.004G220400 | LAAIGKLMFAQFSELVNDYNNGLPSNLSSGRNPSLDYGFNGAEIAMASYCSELQFLGNP                                                               | 477 |
| Sobic.004G220500 | IAAIGKLMFAQFSELVNDYNNGLPSNLSSGRNPSLDYGFNGAEIAMASYCSELQFLGNP                                                               | 473 |
| Sobic.004G220600 | IAAIGKLMFAQFSELVNDYNNGLPSNLSSGRNPSLDYGFNGAEIAMASYCSELQFLGNP                                                               | 473 |
| Sobic.004G220700 | IAAIGKLMFAQFSELVNDYNNGLPSNLSSGRNPSLDYGFNGAEIAMASYCSELQFLGNP                                                               | 473 |
| Sobic.004G220300 | IANIGKLMFAQFSELVNEFYNNGLTSLNLAGSRNPSLDYGFNGTEIAMASYCSELQYLGNP                                                             | 462 |
| Sobic.006G148800 | IANIGKLMFAQFSELVNEFYNNGLTSLNLAGSRNPSLDYGFNGTEIAMASYCSELQYLANP<br>:* *****:*** .:* .*** **:* .*:*****:*.*:*****:*.**       | 462 |
| Sobic.001G160500 | VTNHVQTAEQHNQSVNSLGLISSRMTAEAVTILKLSSTFLIALCQAVDLRQLEESIKAA                                                               | 536 |
| Sobic.006G148900 | VTNHVQSAEQHNQDVNSLGLISSRKTAEAVDLKLSSTFLIALCQAVDLRHEENLKSA                                                                 | 533 |
| Sobic.004G220400 | VTNHVQSAEQHNQDVNSLGLISSRKTAEADILKLMSTFLIALCQAVDLRHEENVKAA                                                                 | 537 |
| Sobic.004G220500 | VTNHVQSAEQHNQDVNSLGLISSRKTAEAEIILKLSSTFLIALCQAVDLRHEENVKSA                                                                | 533 |
| Sobic.004G220600 | VTNHVQSAEQHNQDVNSLGLISSRKTAEAEIILKLSSTFLIALCQAVDLRHEENVKSA                                                                | 533 |
| Sobic.004G220700 | VTNHVQSAEQHNQDVNSLGLISSRKTAEAEIILKLSSTFLIALCQAVDLRHEENVKSA                                                                | 533 |
| Sobic.004G220300 | ITNHVQSAEQHNQDVNSLGLVRSARKTAEADILKLSSTYIVALCQAVDLRHEENIKTS                                                                | 522 |
| Sobic.006G148800 | ITNHVQSAEQHNQDVNSLGLVRSARKTAEAVDILKLSSTYIVALCQAVDLRHEENLKSA<br>:****:*****.*****:* * *****: *****:*****:*****:***:*.**::  | 522 |
| Sobic.001G160500 | VKNCVARVAKKCLAMDDAAA----AAQLLGAVDRAVAVFTYAEPCRPSPPLMKQLRV                                                                 | 591 |
| Sobic.006G148900 | VKSCVTTVAKKTLSTSATGGLHNRARCEKDLLTAIDREAVFAYADDPSCSANYPLMQMRS                                                              | 593 |
| Sobic.004G220400 | VKNCVTQVAKKSLSLNARGGLHNRARCEKDLLQTAIDREAVFAYADDPSPNYPLMQKLRA                                                              | 597 |
| Sobic.004G220500 | VKSCVMTVAKKTLSTNSTGGLHVARFCEKDLLQEIIEAVFAYADDPSCSANYPLMKKLRN                                                              | 593 |
| Sobic.004G220600 | VKSCVMTVAKKTLSTNSTGGLHVARFCEKDLLQEIIEAVFAYADDPSCSANYPLMKKLRN                                                              | 593 |
| Sobic.004G220700 | VKSCVMTVAKKTLSTNSTGGLHVARFCEKDLLQEIIEAVFAYADDPSCSANYPLMKKLRN                                                              | 593 |
| Sobic.004G220300 | VKNTVTQVAKKVLTMNPSGLDSSARFSEKELITAIIDREGVFTYADDPASASLPLMTKLRA                                                             | 582 |
| Sobic.006G148800 | VKNCVMAAARKVLTSLDGLHSARFSEKALLTAIDREAVGYDDPSCSANSPLMKKIRA<br>** . * .*: * * : . . . * .: * .*: * .** . . *** **:          | 582 |
| Sobic.001G160500 | VLMEHALGAAEGAV-ETTSILAKVAEFEQQLRAVLPDEVEAARAAVESGTA--PKRIAEC                                                              | 648 |
| Sobic.006G148900 | VLVEHALANGAEERDPETSVFAKVATFEELRAALPREVDAARAAVENGTAAPVNRIAEC                                                               | 653 |
| Sobic.004G220400 | VLIEHALANGDAERVVETSI FAKVAEFEQVRAALPKEVEAARAAVESGNPLVPNRIKEC                                                              | 657 |
| Sobic.004G220500 | VLVERALANGAAEFDAETSVFAKVAQFEELRAALPKAVEAARAAVENGTAAPVNRITEC                                                               | 653 |
| Sobic.004G220600 | VLVERALANGAAEFDAETSVFAKVAQFEELRAALPKAVEAARAAVENGTAAPVNRITEC                                                               | 653 |
| Sobic.004G220700 | VLVERALANGAAEFDAETSVFAKVAQFEELRAALPKAVEAARAAVENGTAAPVNRITEC                                                               | 653 |
| Sobic.004G220300 | VLVDHALSSGDAERE--PSVFSKITKFEELRAVLPREVEAARVAEAGTAPVANRIADS                                                                | 640 |
| Sobic.006G148800 | VLVDHALASGEAEKASASVFSKINRFEEALREALPREMEARVAFETGTAPIGNRIKDS<br>*::*:** . . . *::*: ** : * ** :*:**.* . * .: ** :           | 642 |
| Sobic.001G160500 | RSYPLYRFVREELGAEYLTGEKTRSPEEEVVKVVIAMNQRKHIDPILLECLSDWKGAPLHA                                                             | 708 |
| Sobic.006G148900 | RSYPLYRFVREELGTEYLTGEKTRSPEEEVNVKVFVAMNLGKHIDAVLECLKEWNGEPLPI                                                             | 713 |
| Sobic.004G220400 | RSYPLYRFVREEVGTQYLTGEKTRSPEEELNKVLVAINQRKHVDPILLECLKEWNGEPLPL                                                             | 717 |
| Sobic.004G220500 | RSYPLYRFVRQEVGAVYLTGEKTRSPEEELNKVLVAINQGHIDPILLECLKEWNGEPLPI                                                              | 713 |
| Sobic.004G220600 | RSYPLYRFVRQEVGAVYLTGEKTRSPEEELNKVLVAINQGHIDPILLECLKEWNGEPLPI                                                              | 713 |
| Sobic.004G220700 | RSYPLYRFVRQEVGAVYLTGEKTRSPEEELNKVLVAINQGHIDPILLECLKEWNGEPLPI                                                              | 713 |
| Sobic.004G220300 | RSFPLYRFVREELGCVFLTGEKLSPEEECTKVFNQINQGLVDPMLECLKEWDGKPLPI                                                                | 700 |
| Sobic.006G148800 | RSYPLYRFIRQDLGAVYLTGEKLSPEEELNKVFLALSEGKLDIPMLECLKEWDGKPLPI<br>**:*:*:*:*:*: * :***** :***** ** . :. * : * :*****:*.** ** | 702 |
| Sobic.001G160500 | T*--- 709                                                                                                                 |     |
| Sobic.006G148900 | C*--- 714                                                                                                                 |     |
| Sobic.004G220400 | C*--- 718                                                                                                                 |     |
| Sobic.004G220500 | C*--- 714                                                                                                                 |     |
| Sobic.004G220600 | C*--- 714                                                                                                                 |     |
| Sobic.004G220700 | C*--- 714                                                                                                                 |     |
| Sobic.004G220300 | NVVN* 704                                                                                                                 |     |
| Sobic.006G148800 | C*--- 703                                                                                                                 |     |

**Supplementary Table S2.** List of *cis*-elements identified in promoter region of PAL genes in sorghum

| <i>Cis</i> -elements | SbPAL1 | SbPAL2 | SbPAL3 | SbPAL4 | SbPAL5 | SbPAL6 | SbPAL7 | SbPAL8 |
|----------------------|--------|--------|--------|--------|--------|--------|--------|--------|
| 3-AF1 binding site   | 0      | 0      | 1      | 1      | 0      | 0      | 0      | 0      |
| A-box                | 2      | 1      | 0      | 0      | 2      | 0      | 1      | 1      |
| AAGAA-motif          | 0      | 1      | 1      | 1      | 2      | 2      | 1      | 0      |
| ABRE                 | 2      | 10     | 1      | 1      | 5      | 2      | 5      | 8      |
| ABRE3a               | 1      | 1      | 0      | 0      | 2      | 0      | 1      | 1      |
| ABRE4                | 1      | 1      | 0      | 0      | 0      | 0      | 1      | 1      |
| AC-I                 | 0      | 1      | 0      | 0      | 0      | 0      | 3      | 2      |
| AC-II                | 0      | 1      | 0      | 0      | 2      | 0      | 1      | 2      |
| ACE                  | 0      | 1      | 0      | 0      | 0      | 0      | 0      | 1      |
| AE-box               | 0      | 1      | 0      | 0      | 1      | 0      | 0      | 0      |
| ATC-motif            | 0      | 1      | 0      | 0      | 0      | 0      | 0      | 0      |
| ARE                  | 2      | 0      | 4      | 1      | 0      | 0      | 7      | 2      |
| AT~ABRE              | 0      | 0      | 0      | 0      | 0      | 0      | 0      | 1      |
| AT1-motif            | 0      | 0      | 1      | 1      | 0      | 0      | 0      | 0      |
| AT~TATA-box          | 1      |        | 2      | 2      | 2      | 3      | 1      | 0      |
| AuxRE                | 0      | 0      | 0      | 0      | 0      | 0      | 0      | 1      |
| Box 4                | 0      | 0      | 1      | 1      | 0      | 0      | 4      | 0      |
| CAAT-box             | 28     | 16     | 26     | 26     | 18     | 41     | 26     | 40     |
| CARE                 | 0      | 0      | 0      | 0      | 0      | 0      | 1      | 0      |
| CAT-box              | 1      | 3      | 1      | 1      | 1      | 0      | 3      | 0      |
| CCAAT-box            | 0      | 0      | 1      | 1      | 0      | 1      | 1      | 0      |
| CCGTCC motif         | 2      | 1      | 0      | 0      | 2      | 0      | 1      | 1      |
| CCGTCC-box           | 1      | 1      | 0      | 0      | 2      | 0      | 1      | 1      |
| CGTCA-motif          | 3      | 2      | 0      | 0      | 3      | 0      | 2      | 0      |
| DRE core             | 1      | 1      | 0      | 0      | 1      | 2      | 0      | 1      |
| DRE1                 | 1      | 1      | 1      | 1      | 0      | 0      | 0      | 0      |
| ERE                  | 0      | 1      | 1      | 1      | 1      | 1      | 0      | 0      |
| F-box                | 1      | 0      | 0      | 0      | 0      | 0      | 3      | 0      |
| G-Box                | 0      | 0      | 0      | 0      | 1      | 0      | 1      | 0      |
| G-box                | 3      | 8      | 1      | 1      | 3      | 1      | 0      | 4      |
| GARE-motif           | 1      | 0      | 2      | 2      | 0      | 0      | 1      | 0      |
| GATA-motif           | 0      | 0      | 0      | 0      | 0      | 2      | 1      | 0      |
| GC-motif             | 2      | 2      | 0      | 0      | 3      | 2      | 1      | 1      |
| GC-repeat            | 0      | 1      | 0      | 0      | 0      | 0      | 0      | 0      |
| GT1-motif            | 1      | 0      | 0      | 0      | 2      | 1      | 0      | 3      |
| HD-Zip 1             | 1      | 0      | 0      | 0      | 0      | 0      | 0      | 0      |

|                      |    |    |    |    |    |    |    |    |
|----------------------|----|----|----|----|----|----|----|----|
| I-box                | 0  | 0  | 0  | 0  | 2  | 0  | 0  | 0  |
| LAMP-element         | 1  | 0  | 1  | 1  | 0  | 0  | 0  | 0  |
| LTR                  | 1  | 0  | 2  | 2  | 0  | 0  | 0  | 1  |
| MBS                  | 1  | 0  | 0  | 0  | 0  | 1  | 1  | 1  |
| MRE                  | 0  | 0  | 0  | 0  | 1  | 0  | 0  | 0  |
| MSA-like             | 1  | 0  | 1  | 1  | 0  | 0  | 0  | 0  |
| MYB                  | 6  | 3  | 4  | 4  | 4  | 4  | 3  | 5  |
| MYC                  | 4  | 1  | 5  | 5  | 5  | 1  | 2  | 3  |
| Myb                  | 1  | 0  | 0  | 0  | 0  | 1  | 0  | 2  |
| Myb-binding site     | 2  | 2  | 2  | 2  | 2  | 0  | 0  | 0  |
| MYB recognition site | 0  | 0  | 1  | 0  | 0  | 1  | 1  | 0  |
| MYB-like sequence    | 0  | 0  | 0  | 0  | 0  | 2  | 1  | 2  |
| Myc                  | 1  | 0  | 0  | 0  | 0  | 0  | 0  | 0  |
| O2-site              | 0  | 2  | 1  | 1  | 1  | 2  | 2  | 0  |
| OCT                  | 1  | 0  | 0  | 0  | 0  | 0  | 0  | 0  |
| P-box                | 0  | 2  | 1  | 1  | 0  | 0  | 0  | 0  |
| RY-element           | 0  | 0  | 0  | 0  | 0  | 4  | 0  | 0  |
| STRE                 | 2  | 3  | 1  | 1  | 5  | 2  | 1  | 6  |
| Spl                  | 4  | 4  | 1  | 1  | 4  | 0  | 1  | 1  |
| TATA                 | 0  | 0  | 0  | 0  | 1  | 0  | 0  | 0  |
| TATA-box             | 18 | 13 | 14 | 14 | 16 | 17 | 15 | 19 |
| TATC-box             | 1  | 0  | 0  | 0  | 0  | 0  | 0  | 1  |
| TC-rich repeats      | 1  | 0  | 0  | 0  | 0  | 0  | 0  | 0  |
| TCA                  | 0  | 0  | 1  | 1  | 0  | 0  | 0  | 0  |
| TCCC-motif           | 0  | 0  | 0  | 0  | 0  | 1  | 2  | 1  |
| TCT-motif            | 2  | 1  | 1  | 1  | 0  | 0  | 0  | 0  |
| TGA-element          | 0  | 0  | 1  | 1  | 1  | 1  | 1  | 1  |
| TGACG-motif          | 3  | 2  | 0  | 0  | 3  | 1  | 2  | 0  |
| W box                | 0  | 1  | 0  | 0  | 2  | 0  | 0  | 2  |
| WRE3                 | 3  | 1  | 1  | 1  | 1  | 1  | 3  | 3  |
| WUN-motif            | 0  | 0  | 0  | 0  | 0  | 0  | 1  | 0  |
| as-1                 | 3  | 2  | 0  | 0  | 3  | 1  | 2  | 0  |
| chs-CMA2b            | 0  | 1  | 0  | 0  | 0  | 0  | 0  | 1  |
| motif I              | 0  | 0  | 0  | 0  | 1  | 0  | 0  | 0  |
| box S                | 0  | 0  | 0  | 0  | 1  | 0  | 0  | 0  |
| dOCT                 | 0  | 0  | 0  | 0  | 0  | 0  | 0  | 2  |

**Supplementary Table S3.** Primer information used in this experiment

| <b>Gene I.D.</b>  | <b>Gene name</b> | <b>Primer name</b> | <b>Primer sequence (3'-5')</b> |
|-------------------|------------------|--------------------|--------------------------------|
| Sobic.004G220300  | SbPAL1           | PAL1-F             | GCCCTCCGTGTTCTCCAAGATCAC       |
|                   |                  | PAL1-R             | TTCGCCACGGGGGCGGTGCCCTC        |
| Sobic.004G220400  | SbPAL2           | PAL2-F             | CTCCATTGGTGTGTCCAT             |
|                   |                  | PAL2-R             | AAGGCCGTTGTTGTAGTAGTC          |
| Sobic.004G220500  | SbPAL3           | PAL3-F             | GGTGCTCGTTGCCATCA              |
|                   |                  | PAL3-R             | TCTCTCTCTATCCGCTTCTC           |
| Sobic.004G220700  | SbPAL5           | PAL5-F             | GGTGCTCGTTGCCATCA              |
|                   |                  | PAL5-F             | ACAGTCTTCTGCTCCTTGTATTT        |
| Sobic.001G160500  | SbPAL6           | PAL6-F             | GAAGTCATGTCCTCCACTTT           |
|                   |                  | PAL6-F             | CGTCCATGGCCAGACATT             |
| Sobic. 006G148800 | SbPAL7           | PAL7-F             | AGGCCGAGAAGGACGCCAGCGCG        |
|                   |                  | PAL7-R             | TTAGCAGATGGGCAGGGGCTTGC        |
| Sobic.006G148900  | SbPAL8           | PAL8-F             | GTGTTCTGCGAGGTGATGAA           |
|                   |                  | PAL8-R             | CTTCTTCGCGAGCATCATGTA          |
| Sobic.002g350400  | Tubulin          | Tub-F              | GAGGTGACGATGCTTTCAACAC         |
|                   |                  | Tub-R              | CACAGGTCAACAATCTCCTTGC         |
